# Supplementary material for: Virus-based enzymatic nanoreactors with acid alpha-glucosidase for the potential treatment of Pompe disease
Source: Royal Society of Chemistry journal article supplement (doi:10.1039/d4ma00943f), 2025-01-01
Supplement: d4ma00943f1.pdf [file d4ma00943f1.pdf]

## Supporting Information

### Virus-based enzymatic nanoreactors with acid alpha-glucosidase for the potential treatment of Pompe disease

Jordan Molina-Solís, Pedro Gama, Kanchan Chauhan, Ana G. Rodríguez-Hernández and Rafael Vazquez-Duhalt\*

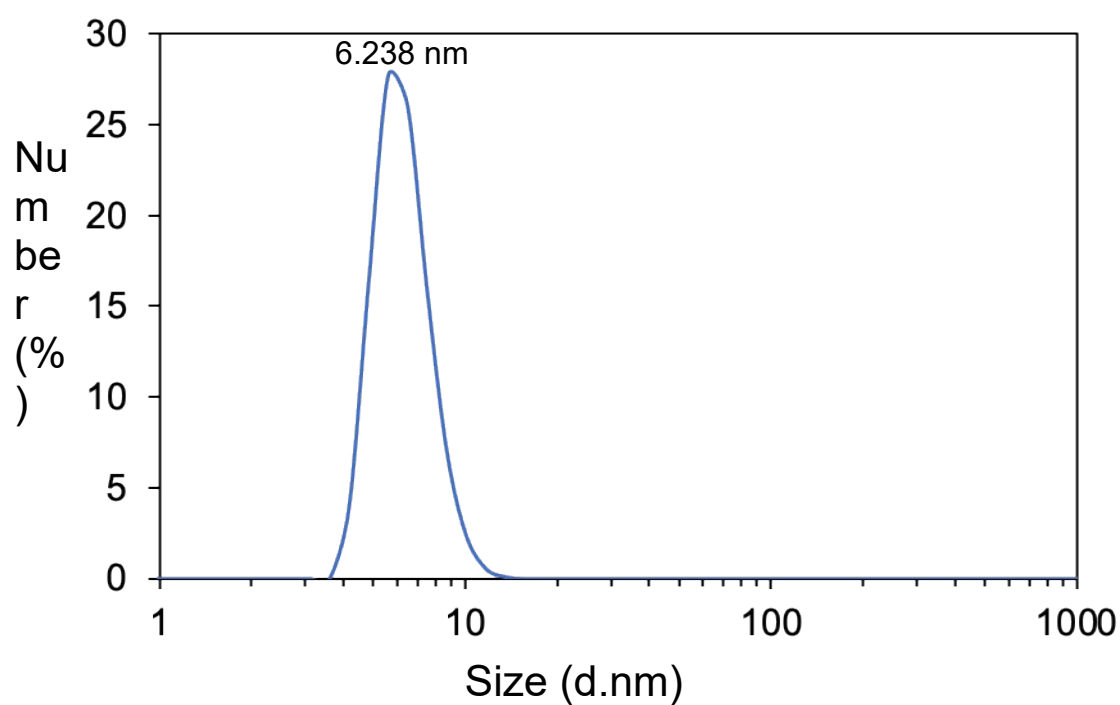

**Figure S1.** The hydrodynamic diameter of free acid alpha-galactosidase (GAA) measured by Dynamic Light Scattering (DLS).

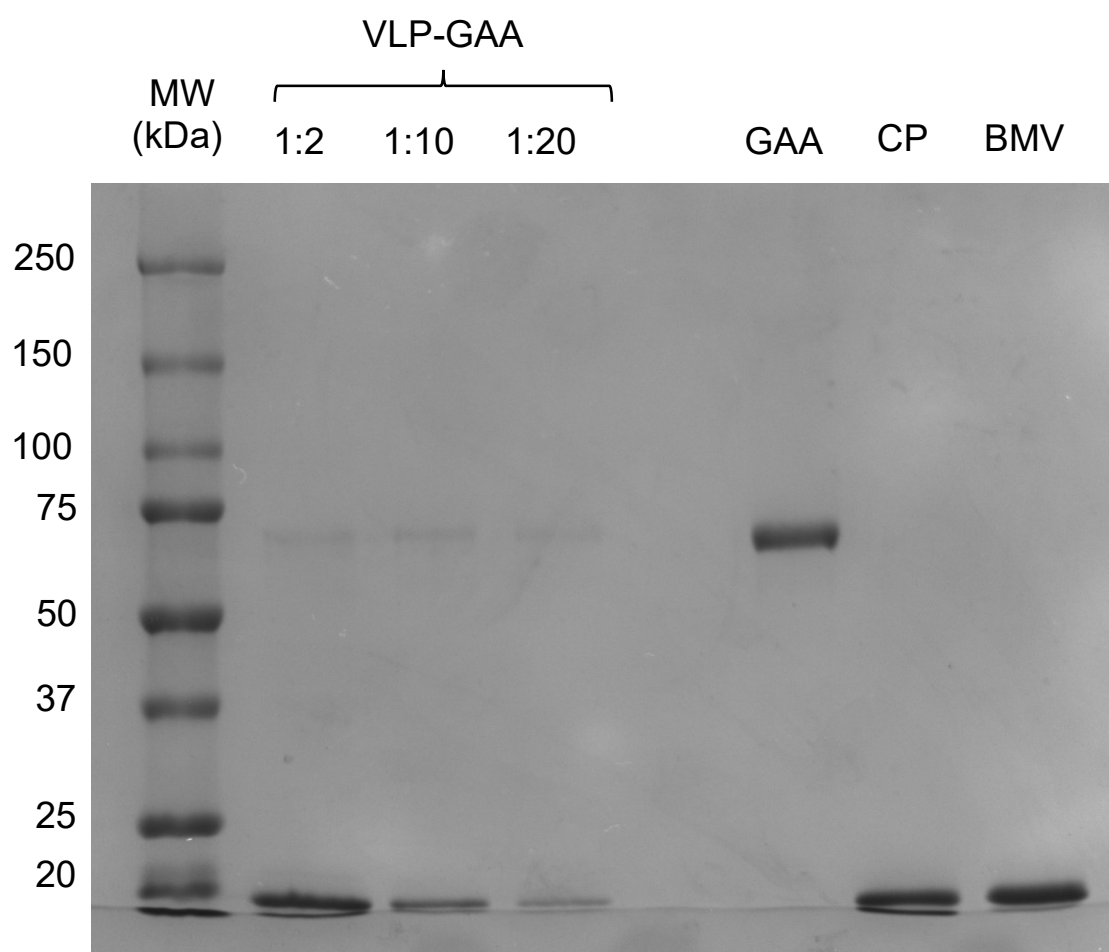

**Figure S2.** SDS-PAGE electrophoresis gel stained with InstanBlue®. VLP-GAA, nanoreactors produced with different molar proportions of coat protein (CP) and acid alpha-glucosidase (GAA) (1:2, 1:10, and 1:20). GAA, free acid alpha-glucosidase. CP, viral coat protein. BMV, virions of Brome mosaic virus. The protein proportions of CP and GAA in the nanoreactors were estimated by densitometry using Image J software.
